# Supplementary material for: Rationally constructing nitrogen–fluorine heteroatoms on porous carbon derived from pomegranate fruit peel waste towards an efficient oxygen reduction catalyst for polymer electrolyte membrane fuel cells
Source: Royal Society of Chemistry journal article supplement (doi:10.1039/d0se01214a), 2020-12-23
Supplement: d0se01214a1.pdf [file d0se01214a1.pdf]

## **Rationally Constructing Nitrogen-Fluorine Heteroatoms on Porous-carbon Derived from Pomegranate-Fruit Peel-waste Towards Efficient Oxygen Reduction Catalyst for Polymer Electrolyte Membrane Fuel Cells**

**Srinu Akula,<sup>\*ab</sup> Prabakaran Varathan,<sup>a</sup> Rahul S Menon<sup>a</sup> and Akhila Kumar Sahu<sup>\*ab</sup>**

<sup>a</sup> CSIR - Central Electrochemical Research Institute-Madras Unit, CSIR Madras Complex, Taramani, Chennai, Tamil Nadu - 600 113, India.

<sup>b</sup> Academy of Scientific and Innovative Research (AcSIR), CSIR-Central Electrochemical Research Institute, Karaikudi, Tamil Nadu- 630003, India.

*\*Corresponding authors.* E-mail: [aksahu@cecri.res.in](mailto:aksahu@cecri.res.in) (A. K. Sahu)

[akula526@gmail.com](mailto:akula526@gmail.com) (Srinu Akula).

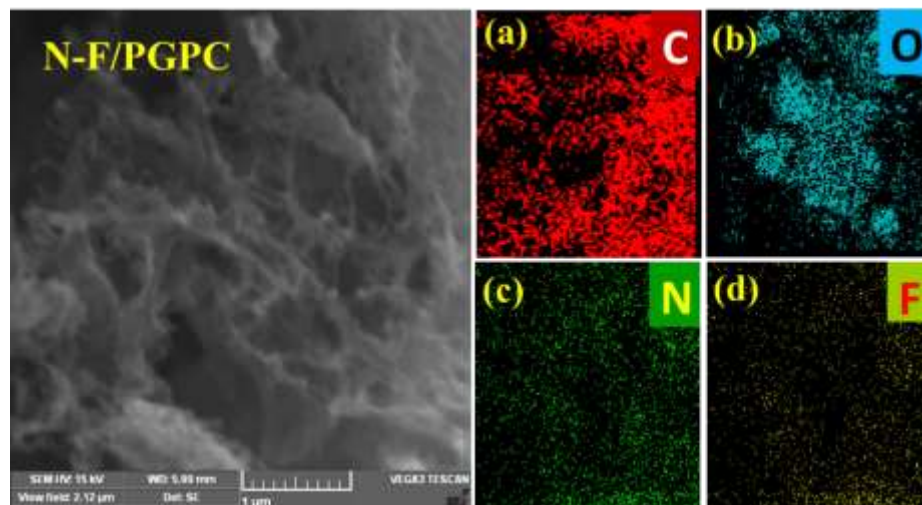

**Fig. S1.** The FE-SEM elemental mappings of N-F/PGPC catalyst showing the uniform distribution of heteroatoms (C, O, N and F) in the carbon matrix.

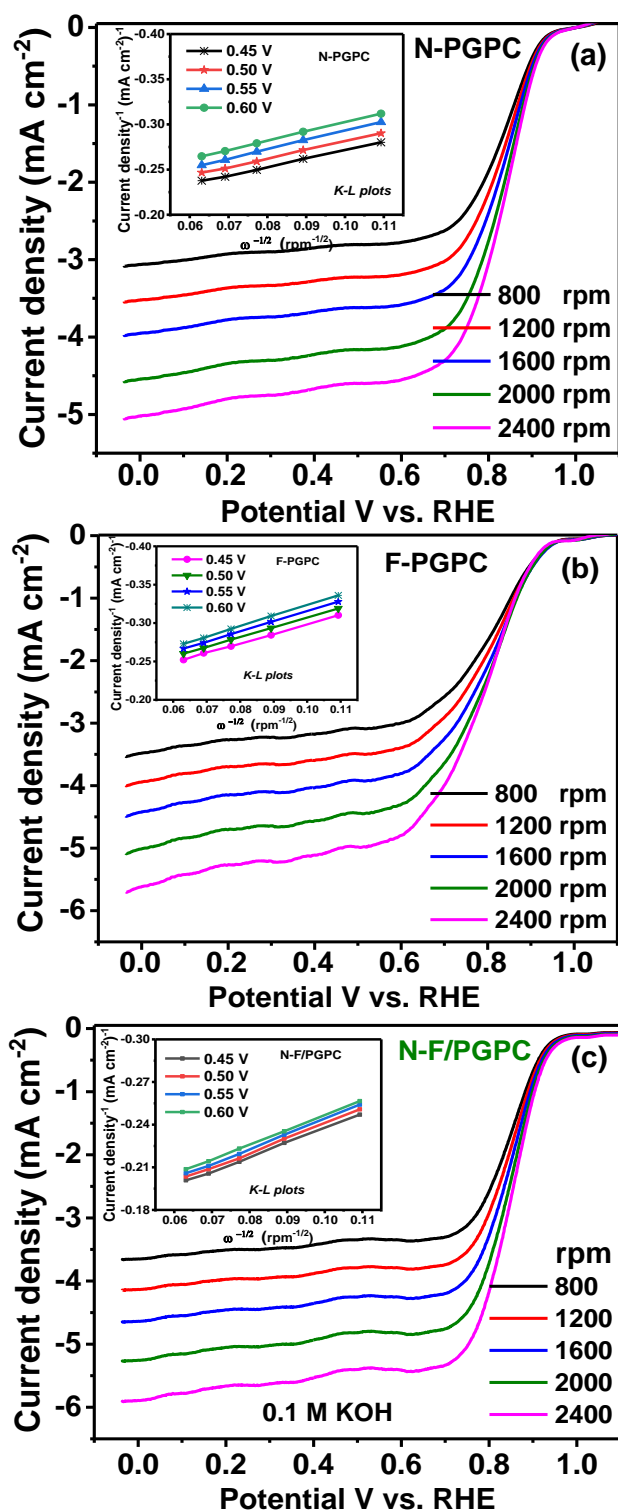

**Fig. S2.** Hydrodynamic voltammograms of (a) N-PGPC, (b) F-PGPC and (c) N-F/PGPC catalysts measured in  $\text{O}_2$ -saturated 0.1 M KOH at  $5 \text{ mV s}^{-1}$  scan rate. The corresponding K-L plots are located in insets.

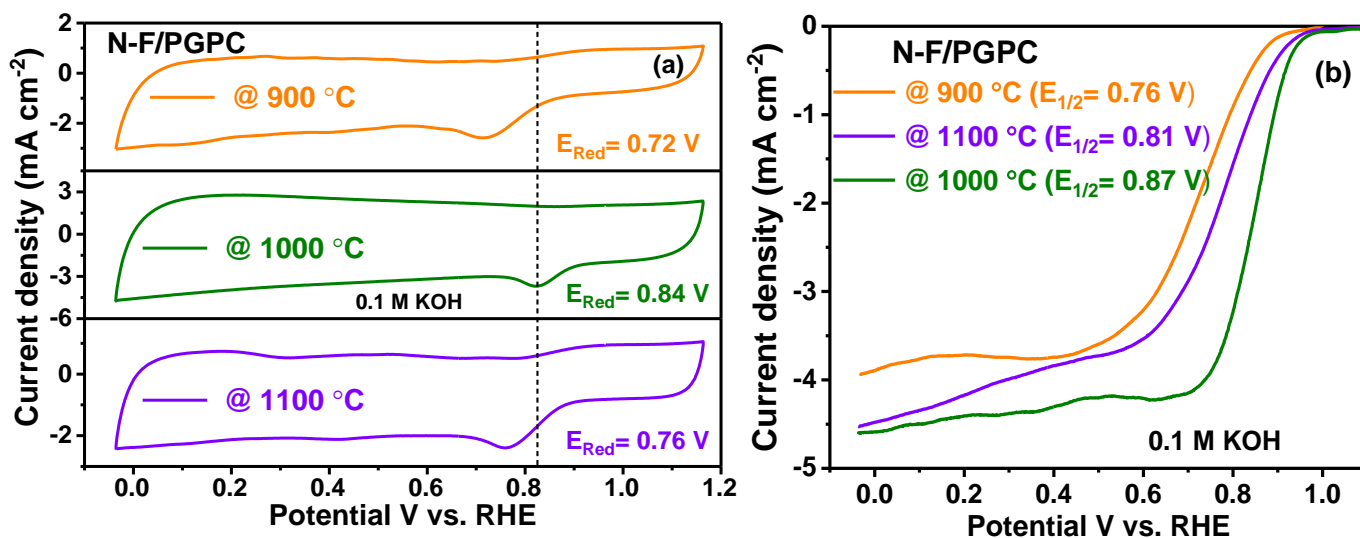

**Fig. S3.** (a), (b) CVs and LSVs of N-F/PGPC catalyst at different temperatures measured in O<sub>2</sub>-saturated 0.1 M KOH aqueous electrolyte, recorded at 50, 5 mV s<sup>-1</sup> respectively. The corresponding  $E_{Red}$ ,  $E_{1/2}$  potentials are pointed in the figures.

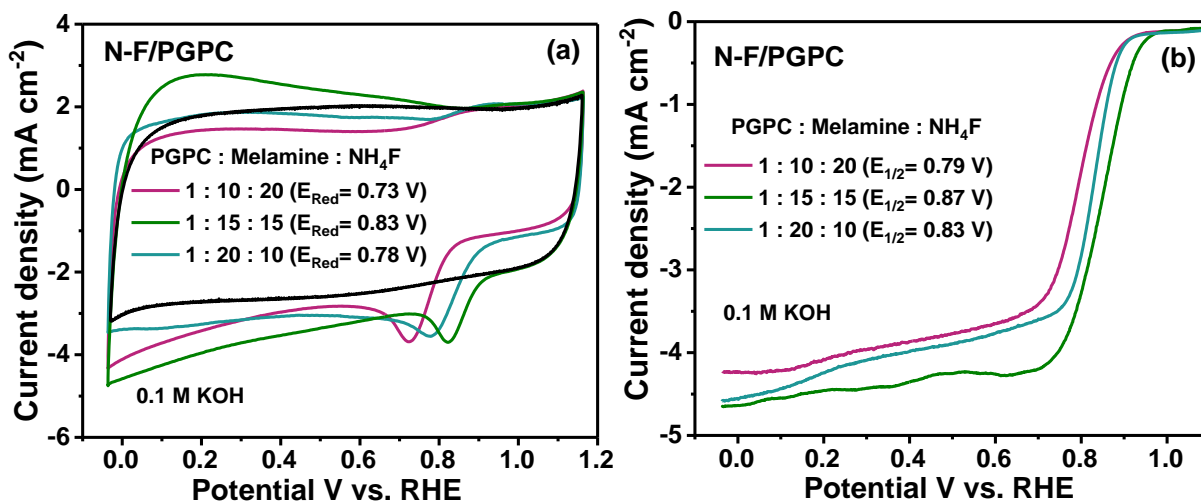

**Fig. S4.** (a), (b) CVs and LSVs of N-F/PGPC catalyst at different weight ratios of PGPC: melamine: NH<sub>4</sub>F measured in O<sub>2</sub>-saturated 0.1 M KOH aqueous electrolyte, recorded at 50, 5 mV s<sup>-1</sup> respectively. The corresponding  $E_{Red}$ ,  $E_{1/2}$  potentials are pointed in the figures.

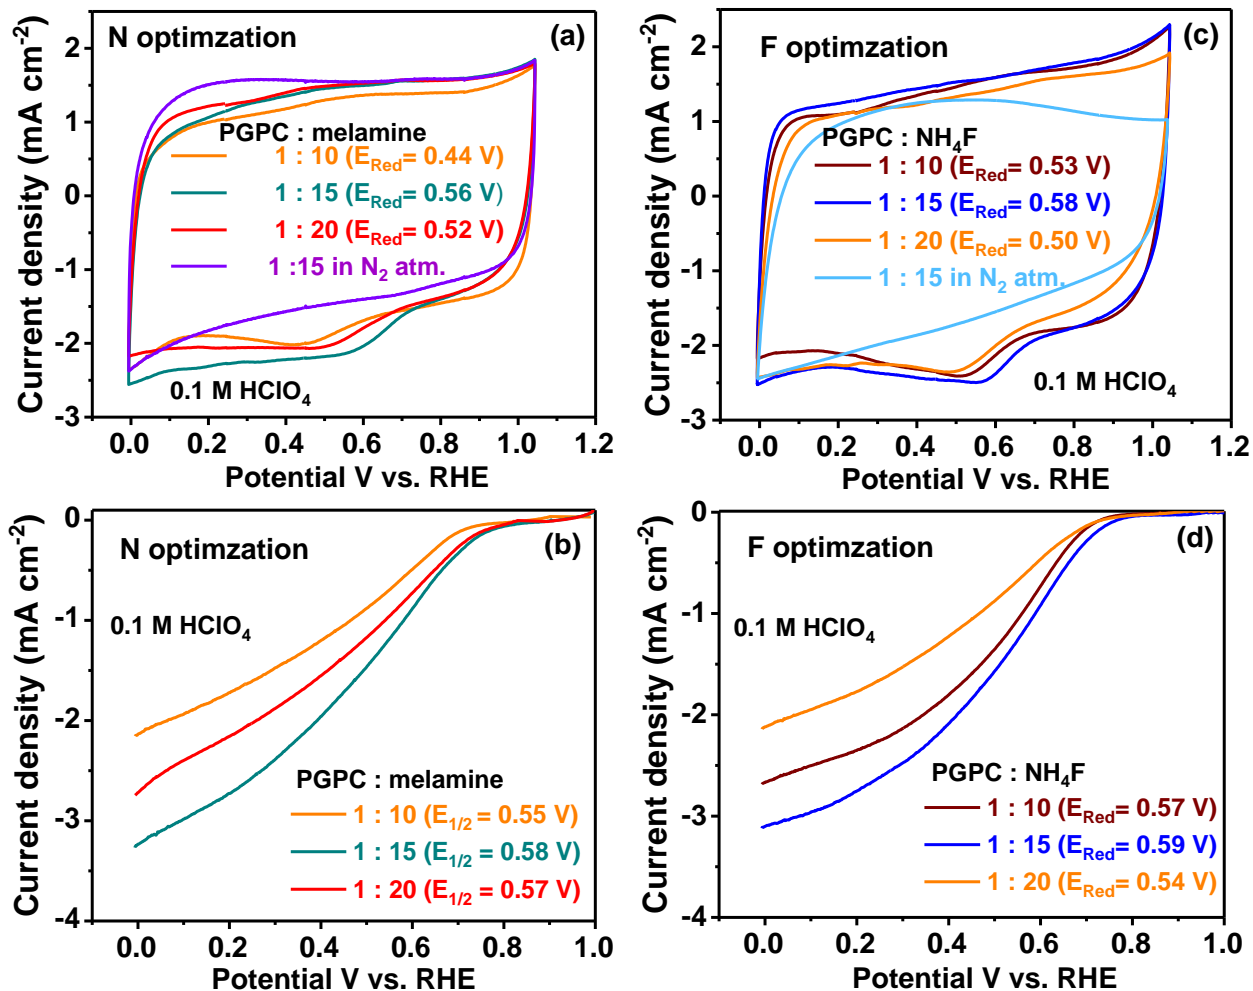

**Fig. S5.** (a,c) CVs for N, F optimizations at different mass ratios of PGPC to melamine and PGPC to NH<sub>4</sub>F respectively at 50 mV s<sup>-1</sup> scan rate respectively, (b,d) the corresponding LSVs at 5 mV s<sup>-1</sup> scan rate, recorded at 1600 rpm rotation rate in O<sub>2</sub>-saturated 0.1 M HClO<sub>4</sub>. The corresponding  $E_{Red}$ ,  $E_{1/2}$  potentials are reported.

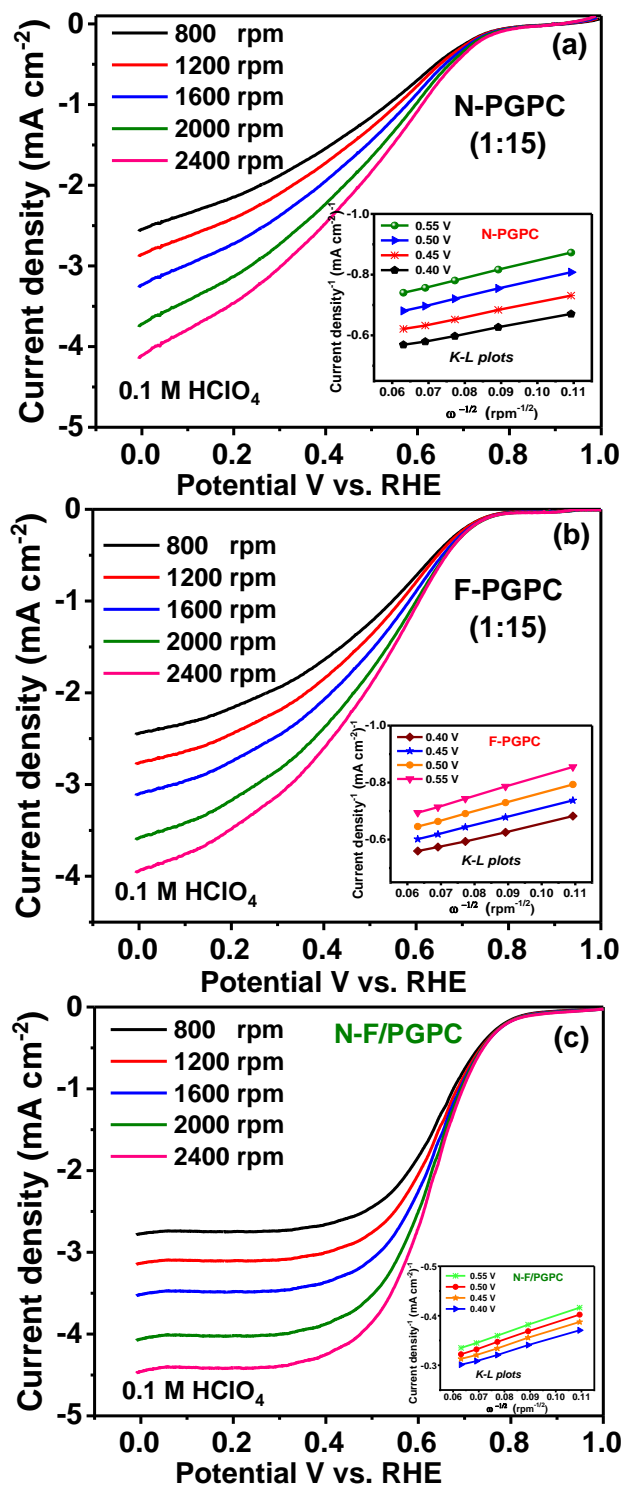

**Fig. S6.** Hydrodynamic voltammograms of (a) N-PGPC, (b) F-PGPC and (c) N-F/PGPC catalysts measured in O<sub>2</sub>-saturated 0.1 M HClO<sub>4</sub> at 5 mV s<sup>-1</sup> scan rate. The corresponding K-L plots are pointed in insets.

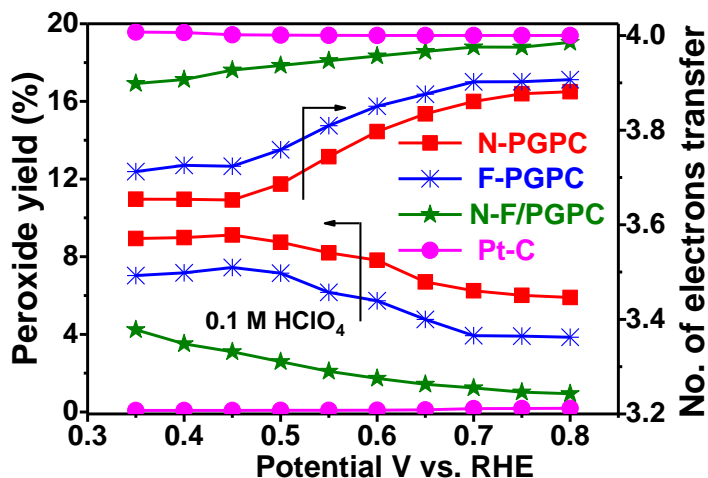

**Fig. S7.** Number of electron transfer,  $\text{HO}_2^-$  produced during ORR process in 0.1 M  $\text{HClO}_4$  electrolyte.

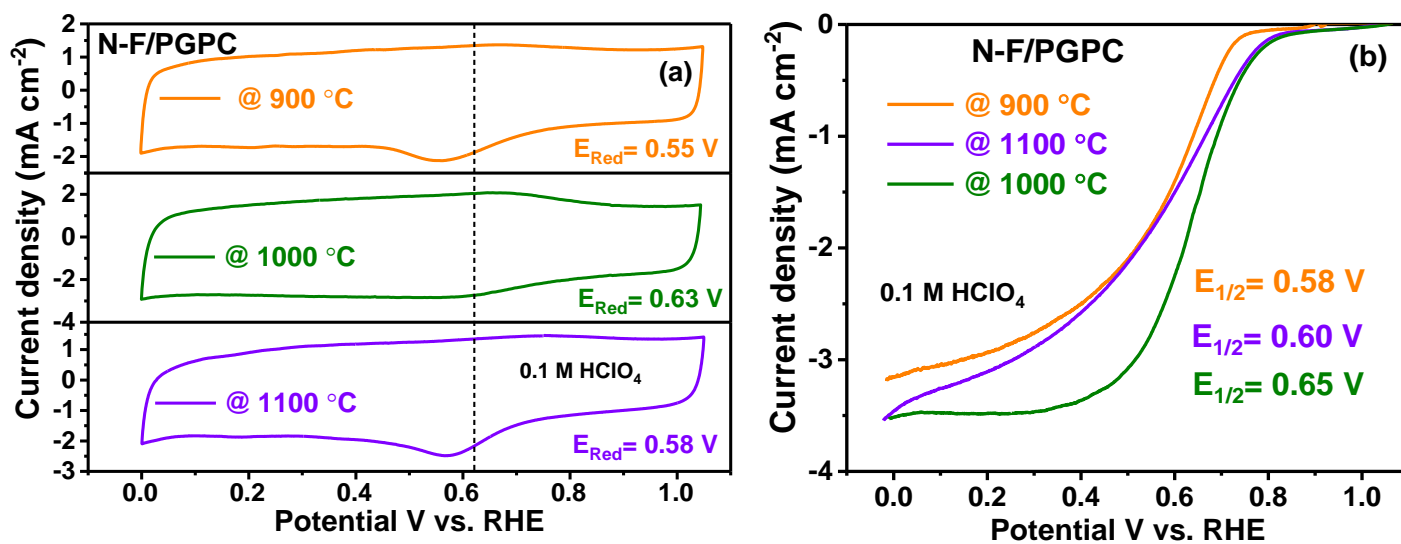

**Fig. S8.** (a), (b) CVs and LSVs of N-F/PGPC catalyst at different temperatures measured in  $\text{O}_2$ -saturated 0.1 M  $\text{HClO}_4$  aqueous electrolyte, recorded at 50, 5  $\text{mV s}^{-1}$  respectively. The corresponding  $E_{\text{Red}}$ ,  $E_{1/2}$  potentials are pointed in the figures.

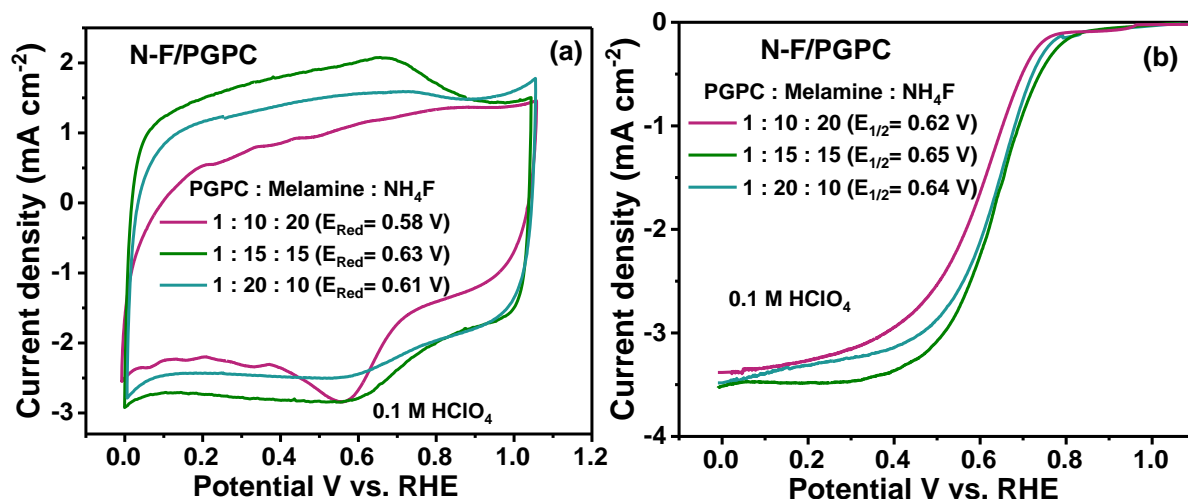

**Fig. S9.** (a), (b) CVs and LSVs of N-F/PGPC catalyst at different weight ratios of PGPC: melamine:  $\text{NH}_4\text{F}$  measured in  $\text{O}_2$ -saturated 0.1 M KOH aqueous electrolyte, recorded at 50, 5  $\text{mV s}^{-1}$  respectively. The corresponding  $E_{\text{Red}}$ ,  $E_{1/2}$  potentials are pointed in the figures.

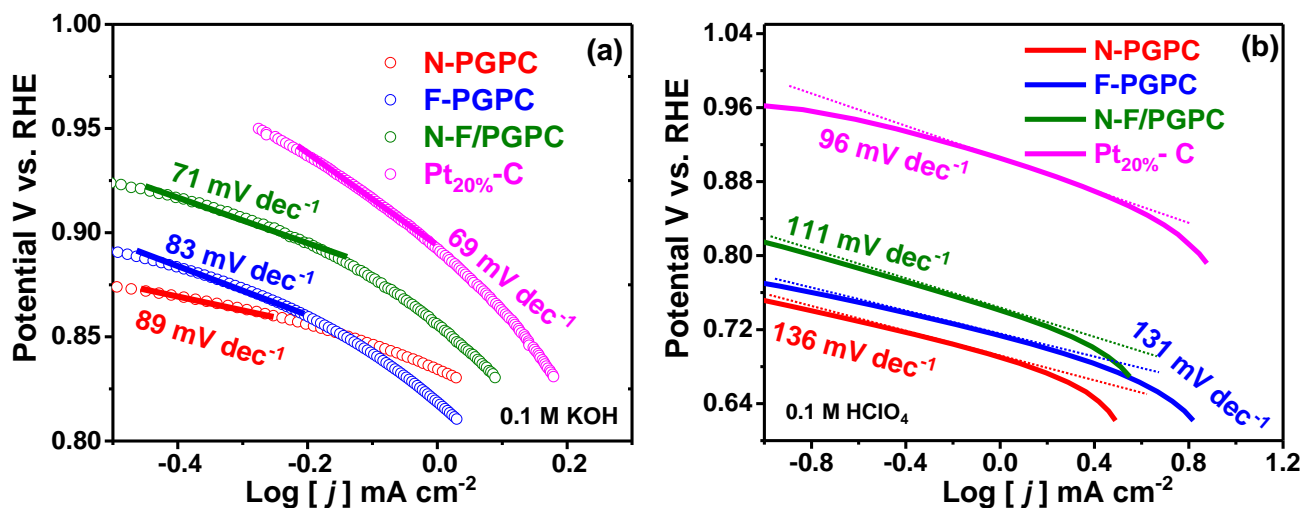

**Fig. S10.** Tafel plots and the corresponding slope values for N-PGPC, F-PGPC, N-F/PGPC and  $\text{Pt}_{20\%}\text{-C}$  catalysts in the higher potential region- (a)  $\text{O}_2$ -saturated 0.1 M KOH; (b)  $\text{O}_2$ -saturated 0.1 M  $\text{HClO}_4$  electrolytes.



**Table S1.** The performance of various catalysts in alkaline electrolyte (KOH/NaOH) developed from the renewable sources reported in the literature.

| S. No. | Source of carbon            | Synthetic process & doped elements (pyrolysis temperature / °C) | Specific / BET surface area (m <sup>2</sup> g <sup>-1</sup> ) | Catalyst loading mg cm <sup>-2</sup> | Electrochemical parameters (V vs. RHE) |                      | Ref. [S]         |
|--------|-----------------------------|-----------------------------------------------------------------|---------------------------------------------------------------|--------------------------------------|----------------------------------------|----------------------|------------------|
|        |                             |                                                                 |                                                               |                                      | Onset (V)                              | E <sub>1/2</sub> (V) |                  |
| 1.     | Ginkgo Leaves               | Pyrolysis @900-1100 & N,P,S                                     | 486                                                           | 0.2                                  | 0.91                                   | 0.76                 | 1                |
| 2.     | Silk Cocoon                 | Pyrolysis @700-900 & N,S                                        | 377                                                           | 0.199                                | 0.85                                   | 0.71                 | 2                |
| 3.     | Pulsatilla Chinensis Regel  | Pyrolysis @700-1000 & N,P                                       | ---                                                           | 0.2                                  | ---                                    | 0.82                 | 3                |
| 4.     | China Rose                  | Pyrolysis @ 900 & N,S, O                                        | 1478                                                          | 0.15                                 | 0.87                                   | --                   | 4                |
| 5.     | Sweet Osmanthus Fruit       | Pyrolysis @ & N,S, P                                            | 431                                                           | 0.31                                 | 0.96                                   | ---                  | 5                |
| 6.     | Chrysanthemum Flowers       | Pyrolysis @700-900 & N, S                                       | 810                                                           | 0.12                                 | 1.05                                   | ---                  | 6                |
| 7.     | Sophora Flower              | Pyrolysis @700-900 & N,S                                        | 1815                                                          | 0.2                                  | 0.92                                   | 0.72                 | 7                |
| 8.     | Mulberry Leaves             | Pyrolysis @ 700-900 & N,S                                       | 1689                                                          | 0.204                                | 0.86                                   | ---                  | 8                |
| 9.     | Lotus Leaves                | Pyrolysis @ 800-1000 & N,S                                      | 908                                                           | 0.658                                | 0.87                                   | 0.81                 | 9                |
| 10.    | Silk Cotton                 | Pyrolysis @ 1000 & N,F                                          | 950                                                           | 0.5                                  | 0.86                                   | 0.82                 | 10               |
| 11.    | Waste Lotus Seedpod         | Pyrolysis @ 700-900 & N,P                                       | 269                                                           | 0.1                                  | 0.87                                   | ---                  | 11               |
| 12.    | Willow Catkins              | Pyrolysis @ 550- 950 & N,P                                      | 257                                                           | 0.204                                | 0.76                                   | ---                  | 12               |
| 13.    | Shaddock Peel               | Pyrolysis @ 600-900 & N, P                                      | 548                                                           | 0.283                                | ---                                    | 0.83                 | 13               |
| 14.    | Waste Pomelo Peels          | Pyrolysis @ 1000 & N,S                                          | 869                                                           | 0.85                                 | 0.85                                   | ---                  | 14               |
| 15.    | Fructus Azedarach           | Pyrolysis @ 900 & N,P                                           | 1706                                                          | 0.418                                | 0.94                                   | 0.84                 | 15               |
| 16.    | Eggplant                    | Pyrolysis @ 900 & K, Cl, O                                      | 1051                                                          | 0.12                                 | 0.83                                   | 0.71                 | 16               |
| 17.    | Sweet Potato Vines          | Pyrolysis @ 800 & N, S                                          | 885                                                           | 0.1                                  | 0.94                                   | 0.84                 | 17               |
| 18.    | Coconut Shells              | Pyrolysis @ 1000 & N, P                                         | 1216                                                          | 0.1                                  | 0.81                                   | 0.78                 | 18               |
| 19.    | Garlic Stems                | Pyrolysis @ 600-1000 & N, P                                     | 991                                                           | 0.247                                | 0.97                                   | 0.89                 | 19               |
| 20.    | Yams                        | Pyrolysis @ 700-900 & N, S                                      | 964                                                           | 0.12                                 | 0.94                                   | 0.82                 | 20               |
| 21.    | Bean Sprout                 | Pyrolysis @ 900 & N, P                                          | 572                                                           | 0.23                                 | 0.93                                   | 0.82                 | 21               |
| 22.    | Cellulose Nano fibrils      | Pyrolysis @ 900 & N, S                                          | 612                                                           | 0.25                                 | 0.84                                   | ---                  | 22               |
| 23.    | Basswood Block              | Pyrolysis @ 950 & N, S                                          | 1438                                                          | 0.28                                 | 0.98                                   | 0.86                 | 23               |
| 24.    | Bamboo Stems                | Pyrolysis @ 700-900 & N, S                                      | 753                                                           | 1.0                                  | ---                                    | 0.81                 | 24               |
| 25.    | Sisal Rejects/Rope Industry | Pyrolysis @ 800 & N, S                                          | 1419                                                          | 0.12                                 | 0.84                                   | ---                  | 25               |
| 26.    | Sugarcane Vinasse           | Pyrolysis @ 750 & N, S                                          | 734                                                           | 0.1                                  | 0.86                                   | 0.78                 | 26               |
| 27.    | Pomegranate Fruit Peels     | Pyrolysis @ 900-1100 & N, F                                     | 974                                                           | 0.5                                  | 0.92                                   | 0.87                 | <b>This work</b> |

**Table S2.** The performance of various catalysts in acidic electrolytes (HClO<sub>4</sub>/H<sub>2</sub>SO<sub>4</sub>) developed from the renewable sources reported in the literature.

| S. No. | Source of carbon                      | Synthetic process & doped elements<br>(pyrolysis temperature / °C) | Specific / BET surface area<br>(m <sup>2</sup> g <sup>-1</sup> ) | Catalyst loading<br>mg cm <sup>-2</sup> | Electrochemical parameters<br>(V vs. RHE) |                      | Ref. [S]         |
|--------|---------------------------------------|--------------------------------------------------------------------|------------------------------------------------------------------|-----------------------------------------|-------------------------------------------|----------------------|------------------|
|        |                                       |                                                                    |                                                                  |                                         | Onset (V)                                 | E <sub>1/2</sub> (V) |                  |
| 1.     | Multiwall carbon nanotubes            | Pyrolysis @ 1000 & N, F                                            | 321                                                              | 1.0                                     | 0.64                                      | 0.55                 | 27               |
| 2.     | SO <sub>3</sub> H-PANI/Ketjenblack    | Pyrolysis @ 1000 & N, S, F                                         | 1000                                                             | 1.0                                     | 0.71                                      | 0.63                 | 28               |
| 3.     | Spent coffee grounds                  | Pyrolysis @ 1000 & N,F                                             | 975                                                              | 0.5                                     | 0.79                                      | 0.73                 | 29               |
| 4.     | Sweet osmanthus fruit                 | Pyrolysis @ & N,S, P                                               | 431                                                              | 0.31                                    | 0.44                                      | 0.32                 | 30               |
| 5.     | Graphene                              | Pyrolysis @ 900 & B, N, P                                          | 800                                                              | 0.691                                   | 0.87                                      | 0.64                 | 31               |
| 6.     | Bombyxmori silk fibroin               | Pyrolysis @ 700-1500 & N,O                                         | 1018                                                             | 0.2                                     | 0.79                                      | 0.62                 | 32               |
| 7.     | Waste leather                         | Pyrolysis @ 900 & N, S, Fe                                         | 746                                                              | 0.3                                     | 0.82                                      | 0.74                 | 33               |
| 8.     | Sheep horn                            | Pyrolysis @ 600-900 & N,S                                          | 313                                                              | 0.4                                     | 0.81                                      | 0.72                 | 34               |
| 9.     | Sewage sludge                         | Pyrolysis @ 800 & N, S                                             | 265                                                              | 0.1                                     | 0.57                                      | 0.51                 | 35               |
| 10.    | Seaweed                               | Pyrolysis @ 900 & N, O                                             | 1377                                                             | 0.4                                     | ---                                       | 0.60                 | 36               |
| 11.    | Carbon nanotubes                      | Pyrolysis @ 900 & N, S                                             | 149                                                              | 0.2                                     | 0.52                                      | 0.42                 | 37               |
| 12.    | Keratin                               | Pyrolysis @ 1000 & N, S                                            | 953                                                              | 0.408                                   | 0.45                                      | 0.34                 | 38               |
| 13.    | Graphite nanofibers                   | Pyrolysis @ 1000 & N, F                                            | ----                                                             | 1.0                                     | 0.78                                      | 0.63                 | 39               |
| 14.    | Carbon nanofibers                     | Pyrolysis @ 1000 & N, F                                            | 709                                                              | 0.3                                     | 0.94                                      | 0.81                 | 40               |
| 15.    | China rose                            | Pyrolysis @ 900 & N, S, O                                          | 1478                                                             | 0.15                                    | 0.59                                      | 0.44                 | 41               |
| 16.    | Chitosan                              | Pyrolysis @ 600 & N, B                                             | 796                                                              | 0.383                                   | 0.79                                      | 0.58                 | 42               |
| 17.    | Cysteine                              | Pyrolysis @ 800 & N, S                                             | 1309                                                             | 0.408                                   | 0.81                                      | 0.61                 | 43               |
| 18.    | Feculae bombycis                      | Pyrolysis @ 800 & N, S, P                                          | 435                                                              | 0.3                                     | 0.64                                      | 0.57                 | 44               |
| 19.    | Fructus azedarach                     | Pyrolysis @ 900 & N, P                                             | 1706                                                             | 0.418                                   | 0.91                                      | 0.80                 | 45               |
| 20.    | Allium cepa                           | Pyrolysis @ 900 & N, S                                             | 1859                                                             | 0.141                                   | 0.63                                      | ----                 | 46               |
| 21.    | Porous graphene foams                 | Pyrolysis @ 900 & B, N, P                                          | 670                                                              | 0.2                                     | 0.85                                      | 0.68                 | 47               |
| 22.    | Phytic acid super-molecular aggregate | Pyrolysis @ 1000 & N, P, Co                                        | 952                                                              | 0.31                                    | 0.91                                      | 0.79                 | 48               |
| 23.    | Porous carbon-CNTs                    | Pyrolysis @ 800 & N, P, Co                                         | ---                                                              | 0.24                                    | 0.92                                      | 0.81                 | 49               |
| 24.    | Graphitic carbon spheres              | Pyrolysis @ 1000 & N, S, Fe                                        | 371                                                              | 0.4                                     | 0.85                                      | 0.73                 | 50               |
| 25.    | Carbon nanotubes                      | Pyrolysis @ 900 & N, O, S                                          | 149                                                              | 0.2                                     | 0.44                                      | 0.28                 | 51               |
| 26.    | Dicyandiamide                         | Pyrolysis @ 900 & N, P                                             | 578                                                              | 0.245                                   | 0.6                                       | ----                 | 52               |
| 27.    | Pomegranate fruit peels               | Pyrolysis @ 900-1100 & N, F                                        | 974                                                              | 0.5                                     | 0.77                                      | 0.65                 | <b>This work</b> |

## 5. References

- [S1] F. Razmjooei, K. P. Singh and J.-S. Yu, *Catalysis Today*, 2016, **260**, 148-157.
- [S2] Y. Wang, Y. Lei and H. Wang, *RSC Adv.*, 2016, **6**, 73560-73565.
- [S3] L. Zhao, *RSC Adv.*, 2017, **7**, 13904-13910.
- [S4] Z. Xiao, X. Gao, M. Shi, G. Ren, G. Xiao, Y. Zhu and L. Jiang, *RSC Adv.*, 2016, **6**, 86401-86409.
- [S5] Z. Liu, F. Wang, M. Li and Z.-H. Ni, *RSC Adv.*, 2016, **6**, 37500-37505.
- [S6] L. Xu, H. Fan, L. Huang, J. Xia, S. Li, M. Li, H. Ding and K. Huang, *Electrochimica Acta*, 2017, **239**, 1-9.
- [S7] X. Li and H. Xu, *ChemistrySelect*, 2018, **3**, 10624-10629.
- [S8] D. He, W. Zhao, P. Li, S. Sun, Q. Tan, K. Han, L. Liu, L. Liu and X. Qu, , *J. Alloys and Compounds*, 2019, **773**, 11-20.
- [S9] W. Ye, J. Tang, Y. Wang, X. Cai, H. Liu, J. Lin, B. V. Bruggen and S. Zhou, *Sci. Total Environ.*, 2019, **666**, 865–874.
- [S10] S. Akula, B. Balasubramaniam, P. Varathan and A. K. Sahu, *ACS Appl. Energy Mater.*, 2019, **2**, 3253-3263.
- [S11] B. Zheng, J. Wang, Z. Pan, X. Wang, S. Liu, S. Ding and L. Lang, *J.Porous Materials*, 2020, **27**, 637-646.
- [S12] Y. Ma, J. Zhao, L. Zhang, Y. Zhao, Q. Fan, X. Li, Z. Hu and W. Huang, *Carbon*, 2011, **49**, 5292-5297.
- [S13] L. Lu, J. Yu, Z. Wu, J. Fan, W. Lei, Y. Ouyang, X. Xia, G. He and Q. Hao, *Int. J. Hydrogen Energy*, 2019, **44**, 26982-26991.

- [S14] Y. Ma, S. You, B. Jing, Z. Xing, H. Chen, Y. Dai, C. Zhang, N. Ren and J. Zou, *Int. J. Hydrogen energy*, 2019, **44**, 16624-16638.
- [S15] L. Han, X. Cui, Y. Liu, G. Han, X. Wu, C. (Charles) Xu and B. Li, *Sustain. Energy Fuels*, 2020, **4**, 2707-2717.
- [S16] B. Li, D. Geng, X. S. Lee, X. Ge, J. Chai, Z. Wang, J. Zhang, Z. Liu, T. S. Andy Hor and Y. Zong, *Chem. Commun.*, 2015, **51**, 8841-8844.
- [S17] S. Gao, L. Li, K. Geng, X. Wei and S. Zhang, *Nano Energy*, 2015, **16**, 408-418.
- [S18] M. Borghei, N. Laocharoen, E. Kibena-Põ Idsepp, L.-S. Johansson, J. Campbell, E. Kauppinen, K. Tammeveski and O. J. Rojas, *Appl. Cat. B: Environmental*, 2017, **204**, 394-402.
- [S19] Z. Ma, K. Wang, Y. Qiu, X. Liu, C. Cao, Y. Feng and P. A. Hu, *Energy*, 2018, **143**, 43-55.
- [S20] H. Fan, Z. Dong and J. Zhao, *ChemElectroChem*, 2017, **4**, 3156-3162.
- [S21] D. W. Lee, J.-H. Jang, I. Jang, Y. S. Kang, S. Jang, K. Y. Lee, J. H. Jang, H.-J. Kim and S. J. Yoo, *Small*, 2019, 1902090-1902097.
- [S22] A. Mulyadi, Z. Zhang, M. Dutzer, W. Liu and Y. Deng, *Nano Energy*, 2017, **32**, 336-346.
- [S23] Z. Tang, Z. Pei, Z. Wang, H. Li, J. Zeng, Z. Ruan, Y. Huang, M. Zhu, Q. Xue, J. Yu and C. Zhi, *Carbon*, 2018, **130**, 532-543.
- [S24] M.-J. Kim, J. E. Park, S. Kim, M. S. Lim, A. Jin, O.-H. Kim, M. J. Kim, K.-S. Lee, J. Kim, S.-S. Kim, Y.-H. Cho and Y.-E. Sung, *ACS Catal.*, 2019, **9**, 3389–3398.
- [S25] D. M. Fernandes, A. S. Mestre, A. Martins, N. Nunes, A. P. Carvalho and C. Freire, *Cata. Today*, 2019,
- [S26] A. L. Cazetta, L. Spessato, S. A.R. Melo, K. C. Bedin, T. Zhang, T. Asefa, T. L. Silva, and V. C. Almeida, *Int. J. Hydrogen Energy*, 2020, **45**, 9669-9682.

- [S27] S. Akula, V. Parthiban, S. G. Peera, B. P. Singh, S. R. Dhakate, and A. K. Sahu, *J. Electrochem. Soc.*, 2017, **164**, F568-F576.
- [S28] S. Akula, S. G. Peera, and A. K. Sahu, *J. Electrochem. Soc.*, 2019, **166**, F897-F905.
- [S29] S. Akula and A. K. Sahu, *J. Electrochem. Soc.*, 2019, **166**, F93-F101.
- [S30] Z. Liu, F. Wang, M. Li and Z.-H. Ni, *RSC Adv.*, 2016, **6**, 37500-37505.
- [S31] C. H. Choi, M. W. Chung, H. C. Kwon, S. H. Parka and S. I. Woo, *J. Mater. Chem. A*, 2013, **1**, 3694-3699.
- [S32] T. Iwazaki, H. Yang, R. Obinata, W. Sugimoto, Y. Takasu, *J. Power Sources*, 2010, **195**, 5840–5847.
- [S33] R. Soni, S. N. Bhangе and S. Kurungot, *Nanoscale*, 2019, **11**, 7893-7902.
- [S34] I. S. Amiin, J. Zhang, Z. Kou, X. Liu, O. K. Asare, H. Zhou, K. Cheng, H. Zhang, L. Mai, M. Pan and S Mu, *ACS Appl. Mater. Interfaces*, 2016, **8**, 29408-29418.
- [S35] S. Yuan and X. Dai, *Green Chem.*, 2016, **18**, 4004-4011.
- [S36] Y. Hao, X. Zhang, Q. Yang, K. Chen, J. Guo, D. Zhou, L. Feng and Z. Slanina, *Carbon*, 2018, **137**, 93-103.
- [S37] Q. Shi, F. Peng, S. Liao, H. Wang, H. Yu, Z. Liu, B. Zhang and D. Su, *J. Mater. Chem. A*, 2013, **1**, 14853-14857.
- [S38] J. Zhang, H. Zhou, X. Liu, J. Zhang, T. Peng, J. Yang, Y. Huang and S. Mu, *J. Mater. Chem. A*, 2016, **4**, 15870-15879.
- [S39] S. G. Peera, A. K. Sahu, A. Arunchander, S. D. Bhat, J. Karthikeyan and P. Murugan, *Carbon*, 2015, **93**, 130-142.
- [S40] T. Gong, R. Qi, X. Liu, H. Li and Y. Zhang, *Nano-Micro Lett.*, 2019, 11:9.

- [S41] Z. Xiao, X. Gao, M. Shi, G. Ren, G. Z. Xiao, Y. Zhu and L. Jiang, *RSC Adv.*, 2016, **6**, 86401-86409.
- [S42] Z. Lu, J. Wang, S. Huang, Y. Hou, Y. Li, Y. Zhao, S. Mu, J. Zhang and Y. Zhao, *Nano Energy*, 2017, **42**, 334-340.
- [S43] J. Zhang, H. Zhou, J. Zhu, P. Hu, C. Hang, J. Yang, T. Peng, S. Mu, and Y. Huang, *ACS Appl. Mater. Interfaces*, 2017, **9**, 24545-24554.
- [S44] H. Meng, X. Chen, T. Gong, H. Liu, Y. Liu, H. Li, and Y. Zhang, *ChemCatChem*, 2019, **11**, 1-8.
- [S45] L. Han, X. Cui, Y. Liu, G. Han, X. Wu, C. (Charles) Xu and B. Li, *Sustainable Energy Fuels*, 2020, **4**, 2707-2717.
- [S46] J. Zhang, J. He, H. Zheng, R. Li, and X. Gou, *J. Mater. Sci.*, 2020, **55**, 7464-7476.
- [S47] F. Dong, Y. Cai, C. Liu, J. Liu, J. Qiao, *Int. J. Hydrogen Energy*, 2018, **43**, 12661-12670.
- [S48] T. Najam, S. S. A. Shah, W. Ding, J. Jiang, L. Jia, W. Yao, L. Li, and Z. Wei, *Angew. Chem. Int. Ed.*, 2018, **57**, 15101-15106.
- [S49] S. Guo, P. Yuan, J. Zhang, P. Jin, H. Sun, K. Lei, X. Pang, Q. Xu and F. Cheng, *Chem. Commun.*, 2017, **53**, 9862-9865.
- [S50] J. Xiao, Y. Xia, C. Hu, J. Xi and S. Wang, *J. Mater. Chem. A*, 2017, **5**, 11114-11123.
- [S51] Q. Shi, F. Peng, S. Liao, H. Wang, H. Yu, Z. Liu, B. Zhang and D. S. Su, *J. Mater. Chem. A*, 2013, **1**, 14853-14857.
- [S52] Chang Hyuck Choi, Sung Hyeon Park and Seong Ihl Woo, *J. Mater. Chem. A*, 2012, **22**, 12107-12115.
